# 1 **Single-Cell Electrophysiological Measurements Reveal Bacterial Membrane Potential** 2 **Dynamics during Extracellular Electron Transfer**

3  
4 Sahand Pirbadian<sup>1</sup>, Marko S. Chavez<sup>1</sup>, Mohamed Y. El-Naggar<sup>1,2,3\*</sup>  
5

6 1 Department of Physics and Astronomy, University of Southern California, Los Angeles,  
7 CA, USA.

8 2 Department of Chemistry, University of Southern California, Los Angeles, CA, USA.

9 3 Molecular and Computational Biology Section, Department of Biological Sciences,  
10 University of Southern California, Los Angeles, CA, USA.

11  
12 \*Corresponding author. Email: mnaggar@usc.edu  
13

## 14 **Keywords**

15 Extracellular Electron Transfer, *Shewanella*, Bioenergetics, Bioelectrochemistry, Bacterial  
16 Electrophysiology  
17

18  
19  
20 **Author contributions:** S.P. and M.Y.E-N. conceived the experiments. S.P. performed the  
21 experiments and analyzed the data. M.S.C. designed and fabricated the electrodes. S.P.  
22 and M.Y.E-N. interpreted the results and wrote the paper.  
23

## 24 **This PDF file includes:**

25 Main Text

26 Figures 1 to 6

27 Figure S1

28 Captions for Supplementary Movies 1 to 5  
29  
30  
31  
32  
33  
34  
35  
36  
37  
38  
39  
40  
41  
42  
43  
44  
45  
46  
47  
48

## 49 Abstract

50 Extracellular electron transfer (EET) allows microorganisms to gain energy by linking  
51 intracellular reactions to external surfaces ranging from natural minerals to the electrodes  
52 of bioelectrochemical renewable energy technologies. In the past two decades,  
53 electrochemical techniques have been used to investigate EET in a wide range of  
54 microbes, with emphasis on dissimilatory metal-reducing bacteria, such as *Shewanella*  
55 *oneidensis* MR-1, as model organisms. However, due to the typically bulk nature of these  
56 techniques, they are unable to reveal the subpopulation variation in EET or link the  
57 observed electrochemical currents to energy gain by individual cells, thus overlooking the  
58 potentially complex spatial patterns of activity in bioelectrochemical systems. Here, to  
59 address these limitations, we use the cell membrane potential as a bioenergetic indicator of  
60 EET by *S. oneidensis* MR-1 cells. Using a fluorescent membrane potential indicator  
61 during *in vivo* single-cell level fluorescence microscopy in a bioelectrochemical reactor,  
62 we demonstrate that membrane potential strongly correlates with the electrode potential,  
63 produced current, and position of cells relative to the electrodes. The high spatial and  
64 temporal resolution of the reported technique can be used to study the single-cell level  
65 dynamics of EET not only on electrode surfaces, but also during respiration of other solid-  
66 phase electron acceptors.

## 69 Main Text

### 71 Introduction

72 Respiratory organisms gain free energy by controlling the flow of electrons, from electron  
73 donors to electron acceptors through an intricate network of reduction-oxidation (redox)  
74 components (1). This electron transport (ET) contributes to the generation of ion motive  
75 force (e.g. proton motive force) across a membrane, which is composed of a chemical  
76 component ( $\Delta[\text{ion}]$ ) and an electrical component (membrane potential,  $\Delta\psi$ ), and can  
77 provide energy for various cellular functions. While molecular oxygen ( $\text{O}_2$ ) often serves as  
78 the terminal electron acceptor for many organisms, many microorganisms are capable of  
79 using a variety of other acceptors that can diffuse inside cells to interact with redox  
80 components. However, dissimilatory metal-reducing bacteria, such as *Shewanella*  
81 *oneidensis* MR-1, can also transport electrons to insoluble electron acceptors such as metal  
82 oxide minerals *outside* the cells (2-6). This extracellular electron transport (EET) process  
83 plays an important role in global elemental cycles, and is being harnessed for energy  
84 technologies that produce electricity from fuels in microbial fuel cells (MFC), or for  
85 production of desirable chemical products from electricity in microbial electrosynthesis  
86 (7-9).

87 EET in *S. oneidensis* is facilitated by an array of multiheme *c*-type cytochromes. Electrons  
88 are transferred from the quinone pool to the tetraheme cytochrome CymA at the inner  
89 membrane, and ultimately to the MtrABC porin-cytochrome complex that functions as the  
90 primary electron conduit across the otherwise insulating cell envelope. This conduit  
91 connects the periplasmic decaheme cytochrome MtrA to the outer membrane decaheme  
92 cytochrome MtrC through the MtrB outer membrane porin (4, 10-14). MtrC, along with  
93 another outer membrane decaheme cytochrome OmcA, act as terminal reductases to  
94 transfer electrons to the external electron acceptor, e.g. metal oxide minerals or electrodes.  
95 Outside the cell, various mechanisms allow reduction of solid-phase electron acceptors:  
96 direct contact with the surface, soluble flavins that can serve either as electron shuttles  
97 (15, 16) or as cytochrome-bound redox cofactors enhancing the EET rate (17-19), and via

98 micron-long outer membrane extensions that are proposed to function as bacterial  
99 nanowires (20-23). In addition, it was recently shown that the Mtr/Omc cytochromes  
100 allow electrons to traverse long distances via a thermally activated redox conduction  
101 mechanism along cellular membranes and across multiple neighboring cells (24).

102 Motivated by the fundamental and technological implications of EET (7, 8), many studies  
103 in the past two decades have focused on understanding and enhancing the electron transfer  
104 between bacteria and electrodes. These studies have predominantly relied on bulk  
105 electrochemical techniques, where typically the goal is to observe and optimize a limited  
106 set of outcome variables, e.g. overall current or power output from a whole culture of cells  
107 (25). Despite the wealth of information that these techniques provide, their bulk nature  
108 precludes an assessment of the inherent complexity within a culture containing billions of  
109 cells or more. For instance, these studies typically neglect the likely substantial role of  
110 cell-to-cell variability in both EET and cellular energy acquisition. In addition, bulk  
111 electrochemical techniques played an important role in investigating the fundamentals of  
112 EET mechanisms, including identifying specific proteins involved in EET, through  
113 genetic manipulation and experimentation with electrode materials (10, 26). However, it  
114 can still be difficult to unambiguously distinguish the mechanism underlying the change in  
115 overall electrochemical performance. For example, when a gene encoding a protein of  
116 interest is deleted, it can be unclear if the drop in current output is due to the role of that  
117 protein in direct electron transfer to electrode, cell attachment, or other factors that play a  
118 role in current production.

119 Addressing existing limitations requires the development of techniques that report EET  
120 and cellular activity with simultaneously high spatial (single-cell level) and temporal  
121 (dynamic *in vivo* measurements of changing cellular state) resolution during  
122 electrochemical measurements. Such a technique could differentiate between the activity  
123 of different cells (planktonic vs. attached, varying positions in relation to electrodes) as  
124 well as different EET mechanisms (short and long range mechanisms) that contribute to  
125 the overall current. This data can then inform the design of bioelectrochemical systems in  
126 order to improve their overall performance, or it can help form more direct causal  
127 inferences that enhance our understanding of EET mechanisms at a fundamental level.

128 Although such a technique has been elusive so far, recent studies have made significant  
129 progress on improving the spatial resolution in bioelectrochemical techniques. In one  
130 group of studies, electrochemical activity of individual cells has been measured using  
131 microelectrodes (27-29), revealing the single-cell ET rate and its variability. However,  
132 these experiments are prone to low signal-to-noise ratios due to miniscule single-cell  
133 currents (~100 fA), are cumbersome to implement as they involve optical trapping or  
134 nanofabrication, and provide no information about the bioenergetic impact on the  
135 measured cells. In addition, these measurements generally require removal of cells from  
136 their biofilm context and cannot be performed simultaneously on a large number of cells  
137 in a bioelectrochemical system. In other experiments, electrodes along with attached cells  
138 have been imaged using electron or fluorescence microscopy following electrochemical  
139 measurements (10, 16, 26, 30, 31). This end-point imaging, however, does not reveal the  
140 *in situ* subpopulation dynamics of EET. In one study, McLean *et al.* (32) addressed these  
141 limitations using fluorescence imaging of an optically-accessible microbial fuel cell to  
142 estimate the single cell EET by normalizing observed current with the total cellular count  
143 on the electrodes. This procedure results in an average cellular EET rate, by assuming no  
144 variability in EET or energy gain across the observed population. In other words, it is

145 unable to distinguish between uniform activity by all cells or a much higher level of  
146 activity from a small fraction of the population, situations which might necessitate entirely  
147 different optimization strategies in bioelectrochemical systems.

148 Recently, studies on *Bacillus subtilis* biofilms have used *in vivo* measurements of the cell  
149 membrane potential to examine the dynamics of metabolic synchronization in biofilms  
150 (33-35). A fluorescent cationic dye, Thioflavin T (ThT), was used as a Nernstian  
151 membrane potential indicator during live fluorescence microscopy of biofilms without  
152 affecting cell viability during days-long experiments. Due to its positive charge, ThT  
153 accumulates on the inside of a hyperpolarized (negatively charged) membrane, resulting in  
154 an inverse correlation between ThT fluorescence intensity and membrane potential. The  
155 high spatial and temporal resolution of this technique demonstrated the role of ionic  
156 signaling in *B. subtilis* biofilm synchronization. Motivated by these developments, we set  
157 out to test the utility of *in vivo* membrane potential measurements for monitoring the  
158 population-wide energetic state under EET conditions on electrodes. Using ThT as a  
159 membrane potential indicator during combined *in vivo* fluorescence microscopy and  
160 electrochemical measurements, we show that membrane potential can be used as a live  
161 indicator of EET activity with single-cell resolution. This technique provides a tool for  
162 studying the subpopulation dynamics of EET in microbial electrochemical systems with  
163 high spatial and temporal resolution.

## 164 **Results**

### 165 **Thioflavin T as a Membrane Potential Probe in *Shewanella oneidensis* MR-1**

166 Previously, ThT was used to reveal the membrane potential in *Bacillus subtilis* cells (33-  
167 35). Similarly, we tested whether ThT fluorescence is a reliable indicator of membrane  
168 potential in *S. oneidensis* MR-1. Addition of 10  $\mu$ M ThT to cells from a late exponential-  
169 phase aerobic batch culture resulted in a significant increase in fluorescence intensity of  
170 cells (Fig. 1A). To test whether dissipation of membrane potential has an effect on ThT  
171 fluorescence, we added the protonophore carbonyl cyanide *m*-chlorophenyl hydrazone  
172 (CCCP) to these cells and, as expected, CCCP significantly diminished ThT fluorescence  
173 (Fig. 1A). We hypothesized that addition of oxygen to batch-culture cells lacking any  
174 electron acceptor would increase the activity of the electron transport chain and in turn  
175 hyperpolarize the membrane, leading to an increase in the ThT intensity. Indeed, we  
176 observed a significant increase in ThT fluorescence upon addition of oxygen (Fig. 1B).  
177 Together, these observations point to ThT as a reliable membrane potential probe in *S.*  
178 *oneidensis*.

### 179 **Membrane Potential as an Indicator of Microbe-Anode Electron Transfer**

180 In order to image bacteria inside an electrochemical reactor, we designed a three-electrode  
181 bioelectrochemical reactor (Fig. S1) with a working electrode made of indium tin oxide  
182 (ITO), an optically transparent, electrically conductive material that has been commonly  
183 used in bioelectrochemical systems (17, 24, 27). When placed on an inverted  
184 epifluorescence microscope, this reactor allowed for live imaging of cells attached to the  
185 electrode surface inside the reactor.

186 We next used ThT in the bioelectrochemical reactor described above. Anaerobically pre-  
187 grown cells were washed in a minimal medium and added to the reactor. The reactor was  
188 purged with N<sub>2</sub> during electrochemical measurements to maintain anaerobic conditions

189 with the electrode serving as the sole electron acceptor for respiration. We repeatedly  
190 applied a two-step potential sequence (+0.3 V for 1 hr followed by -0.5 V for 0.5 hr, all  
191 potentials vs. Ag/AgCl 1M KCl) to the working electrode while measuring the current and  
192 monitoring the ThT fluorescence of cells attached to the electrode. These electrode  
193 potentials were chosen to be higher and lower than the redox potentials associated with the  
194 EET pathways in *S. oneidensis* MR-1 (18). We consistently observed a strong dependence  
195 of ThT fluorescence on electrode potential in wild-type *S. oneidensis* cells, both at the  
196 population (Fig. 2A, Movie S1) and single cell (Fig. 2B, Movie S2) levels, with high and  
197 low fluorescence tracking the positive and negative potential steps, respectively.  
198 Therefore, we hypothesized that the rise in EET activity and produced current during the  
199 positive potential step is leading to a more negative membrane potential, in turn causing  
200 an increase in ThT fluorescence. To test this hypothesis, we used a mutant,  
201  $\Delta Mtr/\Delta mtrB/\Delta mtrE$  (36), lacking genes encoding 8 functional periplasmic and outer  
202 membrane cytochromes. As expected, mutant cells produced very little current in the  
203 reactor and, consistent with our hypothesis, there was no correlation between electrode  
204 potential and ThT fluorescence in mutant cells (Fig. 2C, Movie S1).

205 To test whether the membrane potential can be monitored continuously in response to a  
206 smoothly varying electrode potential, we also performed cyclic voltammetry (CV) in the  
207 *S. oneidensis* bioelectrochemical reactors. Similar to the two-step potential sequence  
208 described above, ThT fluorescence tracked the cyclic electrode potential (cycle  
209 period=26.7 min) with an average  $2.9 \text{ min} \pm 1.4 \text{ min}$  time lag (Fig. 3, Movie S3).

## 210 Membrane Potential as a Function of Microbe-Anode Distance

211 Next, we examined the correlation between the bioenergetic state (membrane potential  
212 probed by ThT) of the cells and proximity to the electrodes. We used ITO patterned chips  
213 that provided both a working electrode area (ITO) and an insulating area (glass) in the  
214 same field of view. Cells on the electrode showed a strong ThT fluorescence response to  
215 changes in electrode potential (Fig. 4, Movie S4), whereas cells on glass did not, except  
216 for cells confined within a region near the electrode edge with an average width of  $8.9 \mu\text{m}$   
217 (SD= $12.4 \mu\text{m}$ ) (Fig. 4B). To investigate the nature of electrode potential-correlated  
218 fluorescence in these cells, we added  $5 \mu\text{M}$  of riboflavin to the reactor during a two-step  
219 potential sequence. Flavin addition further expanded the membrane potential region near  
220 the electrode by  $21.8 \pm 4.3 \mu\text{m}$  ( $p=0.0014$ ) (Fig. 5). We also tested a  $\Delta bfe$  mutant (37),  
221 which lacks the bacterial flavin adenine dinucleotide exporter and is inhibited in flavin  
222 secretion. The width of the near-electrode region in the  $\Delta bfe$  mutant was not statistically  
223 significantly different from the wild type ( $p=0.6690$ ) (Fig. 4B).

## 224 Effect of Electrode Material on Cellular Activity

225 The ability to measure EET activity and monitor cellular bioenergetics *in vivo* and at  
226 single-cell level presents new opportunities for studying the biotic-abiotic interaction  
227 between bacteria and various electrode materials. Gold has been occasionally used as  
228 anode material in bioelectrochemical systems (38, 39). However, its efficacy in facilitating  
229 EET activity in *S. oneidensis* has been questioned, as it was shown that *S. oneidensis* does  
230 not attach well to gold and produces small currents on gold electrodes (26). In order to  
231 further assess the suitability of gold, we used patterned gold-coated glass coverslips as  
232 working electrodes in our bioelectrochemical reactor. The gold layer was thin enough ( $5$   
233 nm thickness) to allow fluorescence microscopy of cells inside the reactor. Again, we

234 repeatedly applied a two-step potential sequence to the gold electrode and observed that  
235 ThT fluorescence of cells on gold, but not on glass, depends on electrode potential (Fig. 6,  
236 Movie S5). We also observed cell attachment and currents on gold that were comparable  
237 to ITO electrodes (Fig. 6, Movie S5). We therefore concluded that, under our experimental  
238 conditions, *S. oneidensis* can efficiently perform EET on gold electrodes.

## 239 Discussion

240 We reported a technique for simultaneously measuring microbial EET and tracking the  
241 bioenergetic (membrane potential) state at the single cell level. We first showed, by  
242 demonstrating the effect of protonophore (CCCP) addition and O<sub>2</sub> addition, that the  
243 fluorescent molecule ThT, previously used to visualize ionic signaling in biofilms, acts as  
244 a membrane potential indicator in *S. oneidensis* (Fig. 1). We then applied a periodic two-  
245 step potential sequence to the working electrode of a fluorescence microscope-mounted  
246 bioelectrochemical reactor and used ThT to show that cellular membrane potential was  
247 strongly dependent on electrode potential in the wild-type strain, but not in a mutant  
248 lacking the multiheme cytochromes necessary for EET in *S. oneidensis* (Fig. 2, Movies  
249 S1 and S2). Additionally, during cyclic voltammetry, ThT fluorescence followed the  
250 electrode potential with a short time lag relative to the voltammetry cycle period (Fig. 3,  
251 Movie S3). This delay can be attributed to the time it takes ThT molecules to traverse the  
252 membrane following a change in the membrane potential, and is within the response time  
253 range of similar slow-response membrane potential probes (40). Taken collectively, this  
254 data demonstrates that membrane potential can be used as an indicator of EET activity in  
255 *S. oneidensis*.

256  
257 The dependence of membrane potential on EET can be understood by noting that, under  
258 anaerobic conditions, the *Shewanella* inner membrane is hyperpolarized by proton  
259 translocation resulting from the redox cycling of the quinone pool, where quinones are  
260 reduced by formate dehydrogenase and lactate dehydrogenase, and quinols are  
261 subsequently oxidized by CymA (41). In addition, it was recently shown that while  
262 utilizing high potential electron acceptors, *Shewanella* uses proton- and sodium-pumping  
263 NADH dehydrogenases that hyperpolarize the membrane and reduce the quinone pool  
264 (42). In the presence of an extracellular electron acceptor, electrons are transported from  
265 CymA through the Mtr pathway to the acceptor outside the cell, linking the EET at the  
266 outer membrane to cation-pumping and thus the membrane potential across the inner  
267 membrane. The membrane hyperpolarization resulting from EET serves as an important  
268 component of the proton motive force and the sodium motive force (42, 43), providing the  
269 free energy for several cellular functions.

270  
271 The technique described here can be used to investigate the activity of individual cells and  
272 help distinguish between different EET mechanisms that factor into overall current  
273 production in bioelectrochemical systems. To demonstrate this, we performed the above  
274 experiment, combining electrochemical measurements and ThT fluorescence, with  
275 patterned working electrodes. The spatial pattern of cellular activity matched well with the  
276 electrode pattern, showing that, for the most part, only cells on the electrode contribute to  
277 overall current resulting in enhanced membrane potential, and ruling out electron transport  
278 beyond ~30  $\mu\text{m}$  under our experimental conditions (Fig. 4, Movie S4). However, we also  
279 observed membrane hyperpolarization in a < 30  $\mu\text{m}$  region near the electrode (Fig. 4).  
280 Given the proposed role of flavins as extracellular shuttles and/or cytochrome-bound  
281 cofactors that enhance EET in *S. oneidensis*, we suspected that flavins might play a role.  
282 When comparing a flavin adenine dinucleotide exporter mutant ( $\Delta bfe$ ) with the wild type,

283 we were unable to find a statistically significant difference in the width of the near-  
284 electrode region due to the large variability in the size of this region in both strains (Fig.  
285 4B). However, addition of exogenous riboflavin to the wild-type reactor led to a  
286 statistically significant expansion of the near-electrode region of hyperpolarization (Fig.  
287 5). This expansion of activity is consistent with more than one hypothesis: (1) Flavins act  
288 as electron shuttles between cells on and off electrode, allowing cells in near-electrode  
289 region to maintain EET activity; (2) Cells off the electrode transport electrons to electrode  
290 via redox conduction through the monolayer of cells as demonstrated previously (24),  
291 where added flavins may have enhanced the EET rate by serving as redox cofactors bound  
292 to outer membrane cytochromes (18, 19); and (3) Enhanced ionic influx/efflux resulting  
293 from higher EET activity of cells on electrode, due to added flavins, impacts the  
294 membrane potential of their neighboring cells immediately off the electrode. A similar  
295 effect has been observed in *Bacillus subtilis* biofilms, where cells regulate the membrane  
296 potential of their neighboring cells by releasing cations (33). To distinguish between these  
297 proposals, further investigations are needed to shed light on the mechanism of  
298 hyperpolarization in the near-electrode region.  
299

300 This technique can also directly demonstrate the efficiency of bacterial EET on various  
301 electrode materials. For example, we tested the suitability of gold as the anode material in  
302 a *S. oneidensis* bioelectrochemical reactor (Fig. 6, Movie S5). Although gold could serve  
303 as an ideal anode material for bioelectrochemical studies due to its stability, high  
304 conductivity, and ease of fabrication, previous studies on *S. oneidensis* had shown poor  
305 attachment and low produced currents on gold electrodes (26, 38, 39). This observation  
306 has been attributed to a possible gold toxicity in *Shewanella*. With our technique, we  
307 observed that cells can attach and perform EET on gold, evidenced by live measurements  
308 of membrane potential and produced current (Fig. 6, Movie S5). Differences in attachment  
309 ability and observed EET on gold across studies may therefore reflect different surface  
310 properties resulting from the deposition and preparation techniques (Materials and  
311 Methods), rather than an intrinsic property of gold itself.  
312

313 As with any technique, it is important to discuss limitations. While live monitoring of  
314 membrane potential can be a powerful tool in studying EET, membrane potential cannot  
315 be used as an exclusive indicator of EET activity under all conditions. For example, in the  
316 absence of EET, addition of O<sub>2</sub> to *S. oneidensis* bioreactors results in membrane  
317 hyperpolarization (Fig. 1B). Therefore, it is critical that cells are not exposed to O<sub>2</sub> or  
318 other electron acceptors while using membrane potential to study the interaction between  
319 cells and a specific acceptor (e.g. an electrode). In addition, ThT fluorescence can be  
320 influenced by factors other than membrane potential, such as RNA content (44).  
321 Therefore, when using ThT as a membrane potential probe during EET, it is important to  
322 control for other contributors to ThT fluorescence, for example, by intentionally  
323 manipulating electrode potential as shown in this work.  
324

325 In summary, we demonstrated dynamic measurements of the bioenergetic state of an  
326 electrode-attached population of cells performing EET, with single-cell resolution. By  
327 simultaneously performing electrochemical measurements and tracking the membrane  
328 potential of the model EET organism *Shewanella oneidensis*, we showed that membrane  
329 potential strongly correlates with the electrode potential, EET, and the position of cells  
330 relative to the electrodes. Our study opens the possibility that similar techniques may  
331 prove useful for studying organisms where the impact of EET on bioenergetics  
332 (specifically membrane potential) has not been directly demonstrated, such as newly

333 isolated electrochemically active microorganisms as well as organisms genetically  
334 engineered to perform EET.  
335

## 338 **Materials and Methods**

339 **Cell Growth and Bioelectrochemical Reactor Inoculation:** *Shewanella oneidensis* MR-  
340 1,  $\Delta$ Mtr/ $\Delta$ mtrB/ $\Delta$ mtrE, or  $\Delta$ bfe cells were grown from a frozen stock in aerobic LB broth  
341 at 30°C, 200 rpm, up to an OD<sub>600</sub> of 2.1-2.6. 15 mL of the culture was then centrifuged for  
342 5 min at 4226 ×g and resuspended in 10 mL of a defined medium consisting of 50 mM  
343 PIPES buffer, 85 mM NaOH, 28 mM NH<sub>4</sub>Cl, 1.34 mM KCl, 4.35 mM NaH<sub>2</sub>PO<sub>4</sub>, 20 mM  
344 sodium DL-lactate. The defined medium was supplemented with minerals and amino  
345 acids as described previously (10). 2 mL of the resuspended culture was injected into an  
346 anaerobic bottle containing 100 mL of the defined medium as well as 20 mM or 40 mM of  
347 sodium fumarate. The inoculated bottle was incubated for 20-24 hours at 30°C, 200 rpm.  
348 The culture was then centrifuged for 8 min at 7,000 ×g, resuspended in 8 mL of the  
349 defined medium, and added to the bioelectrochemical reactor, where cells were allowed to  
350 attach to the electrode/glass surface for 20-30 min. The culture in the reactor was then  
351 removed (except for the last ~500 μL which was maintained to avoid drying the attached  
352 cells), and replaced by 8 mL of the defined medium that was supplemented by 10 μM of  
353 Thioflavin T (ThT).  
354

355 **CCCP Test:** 1 mL of the resuspended LB culture (described above) was deposited on a  
356 glass coverslip and placed on a Nikon Eclipse Ti-E inverted fluorescent microscope. Cells  
357 were imaged before and after the addition of 10 μM of ThT. Subsequently, cells were  
358 imaged immediately before and after the addition of 125 μM of the protonophore carbonyl  
359 cyanide *m*-chlorophenyl hydrazone (CCCP).  
360

361 **Bioelectrochemical Reactor Setup:** The reactor was made of a 20-mm diameter glass  
362 tube glued to the working electrode (planar or patterned ITO or gold on a glass coverslip,  
363 as described below) (Fig. S1) using waterproof silicone glue (General Electric Company).  
364 The tube was sealed at the top by a custom-made cap that held a Ag/AgCl 1M KCl  
365 reference electrode (CHI111, CH Instruments Inc.) and a platinum counter electrode  
366 (CHI115, CH Instruments Inc.), as well as the N<sub>2</sub> inlet and outlet ports (Fig. S1). All  
367 electrochemical measurements were performed using a WaveDriver 20  
368 Bipotentiostat/Galvanostat (Pine Research Instrumentation, model# AFP2).  
369

370 **Electrode Fabrication:** The electrodes used in the present study were either purchased  
371 from a commercial supplier, fabricated in-house, or designed in-house and then fabricated  
372 by a local cleanroom foundry service. Planar ITO-coated glass coverslips were purchased  
373 from SPI Supplies (Catalog #:06494-AB). For the in-house fabrication, glass coverslips  
374 (24×60 NO. 1 VWR Micro Cover Glasses, Radnor, PA, USA and 43×50 NO. 1 Thermo  
375 Scientific Gold Seal Cover Glass, Portsmouth NH, USA) were either rinsed with or  
376 sonicated in acetone, isopropanol, and in deionized (DI) water, consecutively. When  
377 sonicated, the coverslips sat in each solvent bath for five minutes. The coverslips were  
378 then dried with N<sub>2</sub> and baked on a hotplate at 150°C for ten minutes to remove any  
379 remaining water. The coverslips were then placed in a Tegal Plasmaline 515 Photoresist  
380 Asher and exposed to an O<sub>2</sub> plasma at 200 W for 2 minutes.  
381  
382



383 For the ITO-patterned electrodes, AZ 5214 photoresist (PR) was spin coated and then  
384 baked onto the cleaned coverslips. Windows for the ITO pattern were opened in the PR  
385 coated coverslips using a Karl Suss MA6 Contact Aligner and a soda-lime glass  
386 photomask. A Denton Discovery 550 Sputter Coater was then used to deposit 300 nm of  
387 ITO onto the PR coated coverslips. The liftoff of excess ITO was achieved by sonicating  
388 the coverslips in one to three consecutive acetone baths for two to ten minutes per bath.  
389 The ITO-patterned coverslips were then baked in a N<sub>2</sub> furnace at 400°C to improve  
390 conductivity. For the Au-patterned electrodes, a CHA Industries Mark 40 e-beam and  
391 thermal evaporator was used to deposit a 5 nm Ti adhesion layer and then a 5 nm Au layer  
392 onto glass coverslips. The Ti and Au layers were both deposited at a rate of 0.02 nm/sec.  
393 During the Ti/Au deposition, an approximately 1 cm wide strip of vacuum chamber safe  
394 tape was laid across the coverslips. After the deposition, the tape was peeled off, leaving a  
395 nonconductive gap between two conductive pads. After fabrication, the coverslips were  
396 then rinsed with acetone, isopropanol, DI water, dried with N<sub>2</sub>, and baked on a hotplate at  
397 150°C for ten minutes. The coverslips were then exposed to an O<sub>2</sub> plasma at 100 W for 1  
398 minute. Additional ITO-patterned electrodes were fabricated using standard cleanroom  
399 photolithography, similar to the above description, at the University of California, San  
400 Diego Nano3 cleanroom.

401  
402 **Simultaneous Electrochemical and Fluorescence Measurements:** The  
403 bioelectrochemical reactor containing the culture was placed over a 40× or a 100×  
404 objective of a Nikon Eclipse Ti-E inverted fluorescent microscope equipped with a drift  
405 correction unit (Nikon Perfect Focus System). N<sub>2</sub> flow into the reactor was started just  
406 before the beginning of the measurements. Time-lapse microscopy and electrochemical  
407 measurements were started simultaneously. In the two-step potential sequence  
408 measurements, +0.3 V for 1 hour followed by -0.5 V for 0.5 hour (vs Ag/AgCl, 1 M KCl)  
409 was repeatedly applied on the working electrode, while brightfield and ‘FITC’ (Nikon  
410 filter set B-2E/C) fluorescence images were acquired at 5-min intervals. In cyclic  
411 voltammetry measurements, the working electrode potential was swept at 1 mV/s, while  
412 brightfield and ‘FITC’ images were acquired at 2-min intervals. In the riboflavin addition  
413 experiment, 5 μM riboflavin was added to the bioelectrochemical reactor containing *S.*  
414 *oneidensis* MR-1 cells during a two-step potential sequence and simultaneous  
415 fluorescence microscopy.

416  
417 **Oxygen Addition Test:** The experimental setup was similarly prepared as in the  
418 electrochemical measurements, but without any potential applied on the working  
419 electrode. Fluorescence imaging began with N<sub>2</sub> flow into the reactor maintaining  
420 anaerobic conditions. After 1.5 hour, the N<sub>2</sub> flow was stopped and was replaced by  
421 ambient air flow. Fluorescence images were acquired immediately before and after the  
422 change from N<sub>2</sub> to air.

423  
424 **Image Analysis:** Fluorescence images acquired by the microscope software (NIS-  
425 Elements AR 4.60, Nikon Inc.) were exported as 16-bit images after linear brightness and  
426 contrast adjustments were made to each entire image, with identical adjustments in all  
427 images from the same time-lapse experiment. Images were then imported into MATLAB  
428 (R2019a, Mathworks). A custom MATLAB code was used to extract an average cell  
429 fluorescence intensity in each image by subtracting the background fluorescence,  
430 excluding pixels with intensities lower than a set threshold in order to retain only cell  
431 fluorescence, and averaging the intensity of the remaining pixels. In the riboflavin  
432 addition experiment, different brightness and contrast adjustments were made to images

433 from before and after riboflavin addition due to the large increase in fluorescence  
434 background upon riboflavin addition. Therefore, the fluorescence intensities in these  
435 images were not directly compared with each other. Instead, these images were only used  
436 independently to calculate the width of the near-electrode region, which depends on the  
437 relative fluorescence intensities of pixels on glass versus electrode within the same image.

438  
439 To quantify the average pixel intensity as a function of distance from the electrode, the  
440 electrode-glass edge was manually defined based on the corresponding brightfield image,  
441 in turn allowing for the calculation of the distance from each pixel to the edge. The  
442 average pixel intensity was then plotted as a function of distance, with negative and  
443 positive distances indicating pixels on the electrode and glass, respectively.

444  
445 **Width of the Near-Electrode Region of Hyperpolarization:** The near-electrode region  
446 width ( $w$ ) was defined as the distance from the electrode-glass edge where the  
447 fluorescence intensity on glass drops by a factor of  $e$  ( $\sim 2.718$ ) relative to the electrode  
448 fluorescence intensity. This can be written as  $fl(w) = (fl_{electrode} - fl_{glass})/e$ , where  $fl(w)$  is the  
449 fluorescence intensity on glass at the end of the near-electrode region,  $fl_{electrode}$  is the  
450 average fluorescence intensity on the electrode (or the fluorescence intensity at the  
451 electrode edge in the riboflavin addition experiment), and  $fl_{glass}$  is the average fluorescence  
452 intensity on glass far from the electrode (50  $\mu\text{m}$  and farther from the electrode edge).

453  
454 **Statistical Analysis:** For the comparison of the near-electrode region width between *S.*  
455 *oneidensis* MR-1 and  $\Delta bfe$  ( $n=3$  separate experiments for each strain), or between before  
456 and after riboflavin addition ( $n=3$  separate fields of view from the same experiment), two-  
457 sided two-sample Student's  $t$ -test was performed to evaluate statistical significance, at a  
458 significance level of 0.05.

## 461 Acknowledgments

462  
463 We thank Dr. Jeffrey Gralnick for kindly providing the  $\Delta Mtr/\Delta mtrB/\Delta mtrE$  mutant strain.  
464 We also thank the Nanoelectronics Research Facility at the University of California Los  
465 Angeles and the Nano3 Cleanroom at the University of California San Diego for making  
466 the fabrication of the electrodes possible. This study was supported by the U.S. Office of  
467 Naval Research Multidisciplinary University Research Initiative Grant No. N00014-18-1-  
468 2632. We also acknowledge support for the development of the technique from the Air  
469 Force Office of Scientific Research Presidential Early Career Award for Scientists and  
470 Engineers (FA955014-1-0294, to M.Y.E.-N.).

## 472 473 474 475 References

- 476  
477 1. P. MITCHELL, Coupling of phosphorylation to electron and hydrogen transfer by a  
478 chemi-osmotic type of mechanism. *Nature* **191**, 144-148 (1961).
- 479 2. C. R. Myers, K. H. Nealson, Bacterial Manganese Reduction and Growth with Manganese  
480 Oxide as the Sole Electron-Acceptor. *Science* **240**, 1319-1321 (1988).

- 481 3. K. H. Nealson, A. Belz, B. McKee, Breathing metals as a way of life: geobiology in  
482 action. *Antonie Van Leeuwenhoek International Journal of General and Molecular*  
483 *Microbiology* **81**, 215-222 (2002).
- 484 4. L. Shi *et al.*, Extracellular electron transfer mechanisms between microorganisms and  
485 minerals. *Nat Rev Microbiol* **14**, 651-662 (2016).
- 486 5. J. A. Gralnick, D. K. Newman, Extracellular respiration. *Molecular Microbiology* **65**, 1-11  
487 (2007).
- 488 6. J. K. Fredrickson *et al.*, Towards environmental systems biology of *Shewanella*. *Nature*  
489 *Reviews Microbiology* **6**, 592-603 (2008).
- 490 7. B. E. Logan, Exoelectrogenic bacteria that power microbial fuel cells. *Nat Rev Micro* **7**,  
491 375-381 (2009).
- 492 8. B. E. Logan, K. Rabaey, Conversion of wastes into bioelectricity and chemicals by using  
493 microbial electrochemical technologies. *Science* **337**, 686-690 (2012).
- 494 9. K. Rabaey, R. A. Rozendal, Microbial electrosynthesis - revisiting the electrical route for  
495 microbial production. *Nature Reviews Microbiology* **8**, 706-716 (2010).
- 496 10. O. Bretschger *et al.*, Current production and metal oxide reduction by *Shewanella*  
497 *oneidensis* MR-1 wild type and mutants. *Appl. Environ. Microbiol.* **73**, 7003-7012 (2007).
- 498 11. M. Breuer, K. M. Rosso, J. Blumberger, J. N. Butt, Multi-haem cytochromes in  
499 *Shewanella oneidensis* MR-1: structures, functions and opportunities. *Journal of the Royal*  
500 *Society Interface* **12** (2015).
- 501 12. R. S. Hartshorne *et al.*, Characterization of an electron conduit between bacteria and the  
502 extracellular environment. *Proceedings of the National Academy of Sciences of the United*  
503 *States of America* **106**, 22169-22174 (2009).
- 504 13. D. J. Richardson *et al.*, The porin-cytochrome' model for microbe-to-mineral electron  
505 transfer. *Molecular Microbiology* **85**, 201-212 (2012).
- 506 14. G. F. White *et al.*, Rapid electron exchange between surface-exposed bacterial  
507 cytochromes and Fe(III) minerals. *Proceedings of the National Academy of Sciences of the*  
508 *United States of America* **110**, 6346-6351 (2013).
- 509 15. E. Marsili *et al.*, *Shewanella* Secretes flavins that mediate extracellular electron transfer.  
510 *Proceedings of the National Academy of Sciences of the United States of America* **105**,  
511 3968-3973 (2008).
- 512 16. D. Coursolle, D. B. Baron, D. R. Bond, J. A. Gralnick, The Mtr Respiratory Pathway Is  
513 Essential for Reducing Flavins and Electrodes in *Shewanella oneidensis*. *Journal of*  
514 *Bacteriology* **192**, 467-474 (2010).
- 515 17. A. Okamoto, K. Hashimoto, K. H. Nealson, R. Nakamura, Rate enhancement of bacterial  
516 extracellular electron transport involves bound flavin semiquinones. *Proceedings of the*  
517 *National Academy of Sciences of the United States of America* **110**, 7856-7861 (2013).
- 518 18. S. Xu, Y. Jangir, M. Y. El-Naggar, Disentangling the roles of free and cytochrome-bound  
519 flavins in extracellular electron transport from *Shewanella oneidensis* MR-1.  
520 *Electrochimica Acta* **198**, 49-55 (2016).
- 521 19. M. J. Edwards *et al.*, Redox Linked Flavin Sites in Extracellular Decaheme Proteins  
522 Involved in Microbe-Mineral Electron Transfer. *Scientific Reports* **5** (2015).
- 523 20. Y. A. Gorby *et al.*, Electrically conductive bacterial nanowires produced by *Shewanella*  
524 *oneidensis* strain MR-1 and other microorganisms. *Proceedings of the National Academy*  
525 *of Sciences of the United States of America* **103**, 11358-11363 (2006).
- 526 21. M. Y. El-Naggar *et al.*, Electrical transport along bacterial nanowires from *Shewanella*  
527 *oneidensis* MR-1. *Proceedings of the National Academy of Sciences* **107**, 18127-18131  
528 (2010).
- 529 22. S. Pirbadian *et al.*, *Shewanella oneidensis* MR-1 nanowires are outer membrane and  
530 periplasmic extensions of the extracellular electron transport components. *Proceedings of*

- 531 *the National Academy of Sciences of the United States of America* **111**, 12883-12888  
532 (2014).
- 533 23. P. Subramanian, S. Pirbadian, M. El-Naggar, G. Jensen, Ultrastructure of *Shewanella*  
534 *oneidensis* MR-1 nanowires revealed by electron cryotomography. *Proceedings of the*  
535 *National Academy of Sciences of the United States of America* **115**, E3246-E3255 (2018).
- 536 24. S. Xu, A. Barrozo, L. Tender, A. Krylov, M. El-Naggar, Multiheme Cytochrome  
537 Mediated Redox Conduction through *Shewanella oneidensis* MR-1 Cells. *Journal of the*  
538 *American Chemical Society* **140**, 10085-10089 (2018).
- 539 25. B. Logan *et al.*, Assessment of Microbial Fuel Cell Configurations and Power Densities.  
540 *Environmental Science & Technology Letters* **2**, 206-214 (2015).
- 541 26. A. Kane, D. Bond, J. Gralnick, Electrochemical Analysis of *Shewanella oneidensis*  
542 Engineered To Bind Gold Electrodes. *Acs Synthetic Biology* **2**, 93-101 (2013).
- 543 27. B. Gross, M. El-Naggar, A combined electrochemical and optical trapping platform for  
544 measuring single cell respiration rates at electrode interfaces. *Review of Scientific*  
545 *Instruments* **86** (2015).
- 546 28. X. Jiang *et al.*, Probing single- to multi-cell level charge transport in *Geobacter*  
547 *sulfurreducens* DL-1. *Nature Communications* **4** (2013).
- 548 29. H. Liu, G. Newton, R. Nakamura, K. Hashimoto, S. Nakanishi, Electrochemical  
549 Characterization of a Single Electricity-Producing Bacterial Cell of *Shewanella* by Using  
550 Optical Tweezers. *Angewandte Chemie-International Edition* **49**, 6596-6599 (2010).
- 551 30. B. Kim, H. Kim, M. Hyun, D. Park, Direct electrode reaction of Fe(III)-reducing  
552 bacterium, *Shewanella putrefaciens*. *Journal of Microbiology and Biotechnology* **9**, 127-  
553 131 (1999).
- 554 31. H. Liu, B. E. Logan, Electricity generation using an air-cathode single chamber microbial  
555 fuel cell in the presence and absence of a proton exchange membrane. *Environ Sci*  
556 *Technol* **38**, 4040-4046 (2004).
- 557 32. J. McLean *et al.*, Quantification of Electron Transfer Rates to a Solid Phase Electron  
558 Acceptor through the Stages of Biofilm Formation from Single Cells to Multicellular  
559 Communities. *Environmental Science & Technology* **44**, 2721-2727 (2010).
- 560 33. A. Prindle *et al.*, Ion channels enable electrical communication in bacterial communities.  
561 *Nature* **527**, 59-63 (2015).
- 562 34. J. Humphries *et al.*, Species-Independent Attraction to Biofilms through Electrical  
563 Signaling. *Cell* **168**, 200-209.e212 (2017).
- 564 35. J. Liu *et al.*, Coupling between distant biofilms and emergence of nutrient time-sharing.  
565 *Science* **356**, 638-642 (2017).
- 566 36. D. Coursolle, J. A. Gralnick, Reconstruction of Extracellular Respiratory Pathways for  
567 Iron(III) Reduction in *Shewanella Oneidensis* Strain MR-1. *Front Microbiol* **3**, 56 (2012).
- 568 37. N. J. Kotloski, J. A. Gralnick, Flavin electron shuttles dominate extracellular electron  
569 transfer by *Shewanella oneidensis*. *MBio* **4** (2013).
- 570 38. M. Sun *et al.*, A gold-sputtered carbon paper as an anode for improved electricity  
571 generation from a microbial fuel cell inoculated with *Shewanella oneidensis* MR-1.  
572 *Biosensors & Bioelectronics* **26**, 338-343 (2010).
- 573 39. S. Crittenden, C. Sund, J. Sumner, Mediating electron transfer from bacteria to a gold  
574 electrode via a self-assembled monolayer. *Langmuir* **22**, 9473-9476 (2006).
- 575 40. J. Plasek, K. Sigler, Slow fluorescent indicators of membrane potential: A survey of  
576 different approaches to probe response analysis. *Journal of Photochemistry and*  
577 *Photobiology B-Biology* **33**, 101-124 (1996).
- 578 41. A. Kane *et al.*, Formate Metabolism in *Shewanella oneidensis* Generates Proton Motive  
579 Force and Prevents Growth without an Electron Acceptor. *Journal of Bacteriology* **198**,  
580 1337-1346 (2016).

- 581 42. C. S. Madsen, M. A. TerAvest, NADH dehydrogenases Nuo and Nqr1 contribute to  
582 extracellular electron transfer by *Shewanella oneidensis* MR-1 in bioelectrochemical  
583 systems. *Sci Rep* **9**, 14959 (2019).
- 584 43. K. L. Duhl, N. M. Tefft, M. A. TerAvest, *Shewanella oneidensis* MR-1 Utilizes both  
585 Sodium- and Proton-Pumping NADH Dehydrogenases during Aerobic Growth. *Appl*  
586 *Environ Microbiol* **84** (2018).
- 587 44. S. Sugimoto, K. Arita-Morioka, Y. Mizunoe, K. Yamanaka, T. Ogura, Thioflavin T as a  
588 fluorescence probe for monitoring RNA metabolism at molecular and cellular levels.  
589 *Nucleic Acids Res* **43**, e92 (2015).
- 590

591  
592

**Figures:**

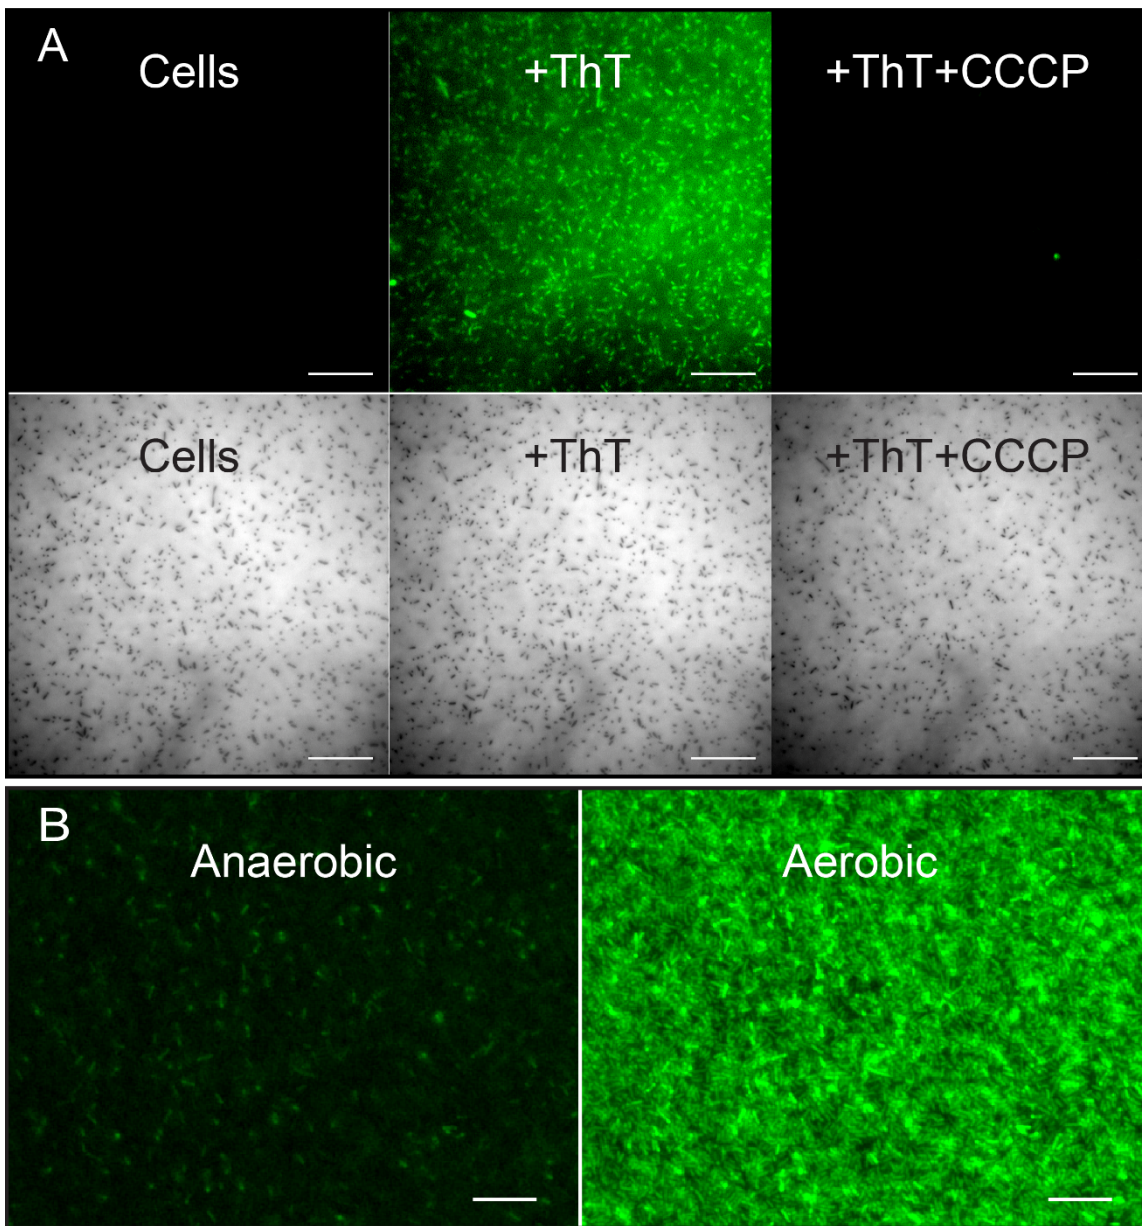

593  
594  
595  
596  
597  
598  
599  
600  
601

**Figure 1: Thioflavin T (ThT) fluorescence is an indicator of membrane potential in *S. oneidensis* MR-1.** (A) (Left) *S. oneidensis* MR-1 cells shown in fluorescence (top) and brightfield (bottom) channels. (Middle) Addition of ThT to cells significantly enhanced their fluorescence intensity. (Right) Subsequent addition of 125  $\mu$ M of the protonophore CCCP significantly reduced cell fluorescence. Scale bars are 20  $\mu$ m. (B) Anaerobic *S. oneidensis* culture containing ThT and no electron acceptors (left) shows low cellular fluorescence intensity. Addition of oxygen resulted in a significant increase in fluorescence (right). Scale bars are 10  $\mu$ m.

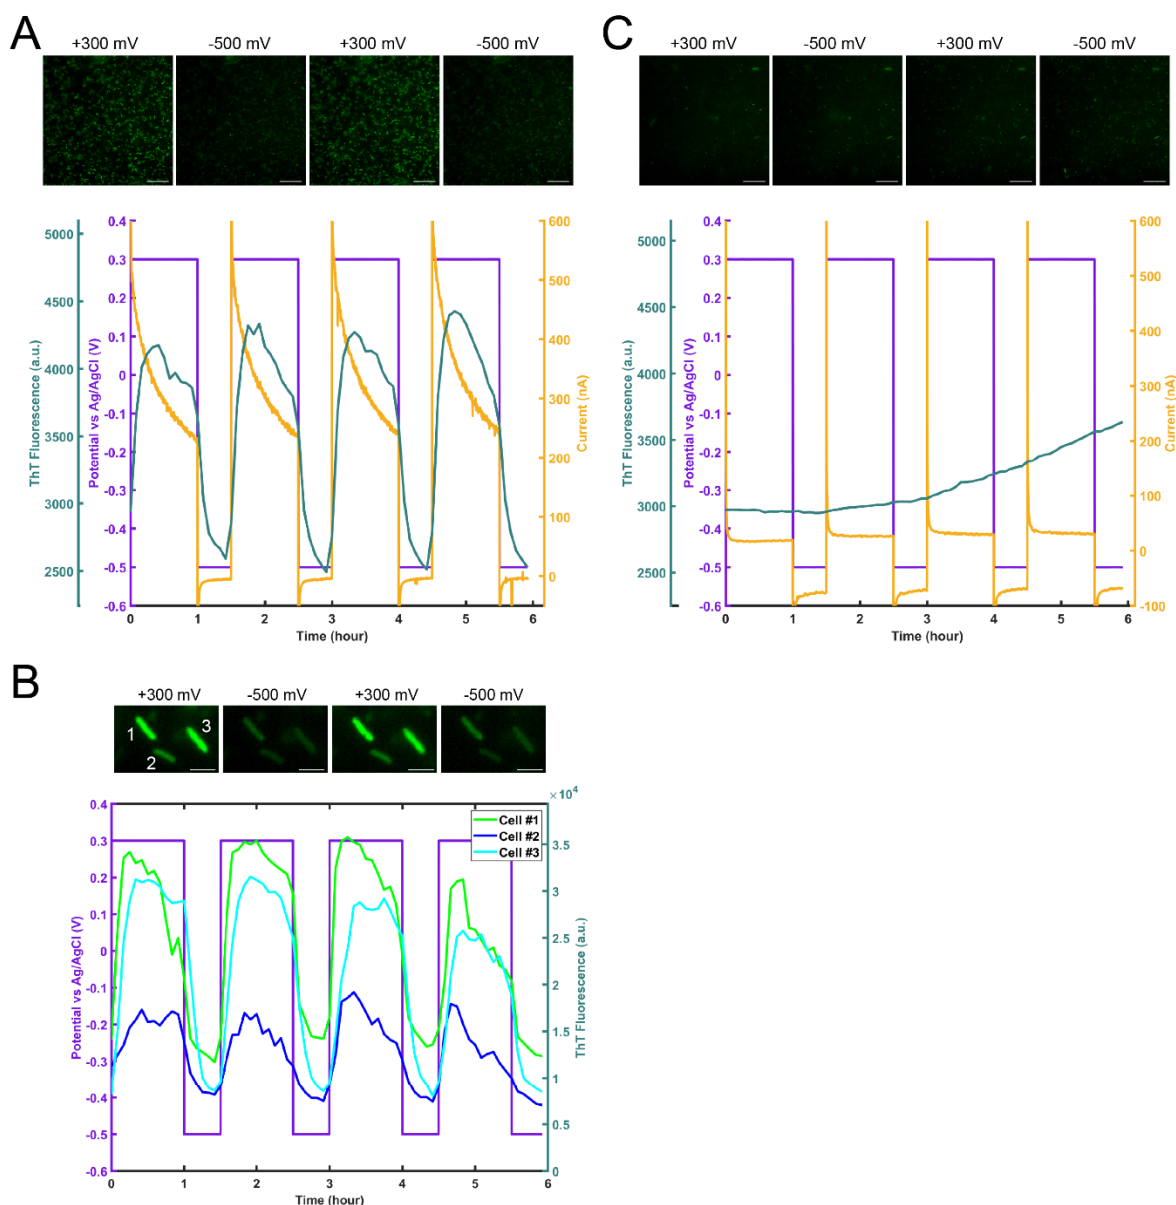

602  
 603 **Figure 2: Membrane potential in *S. oneidensis* is an indicator of extracellular electron**  
 604 **transfer activity at the single-cell level.** (A) Fluorescence images along with electrode  
 605 potential, current, and average Thioflavin T (ThT) fluorescence plots of *S. oneidensis* cells  
 606 on the ITO working electrode of a bioelectrochemical reactor during a two-step potential  
 607 sequence (1 hr at +300 mV, 0.5 hr at -500 mV vs Ag/AgCl 1M KCl). Scale bars are 20  
 608  $\mu\text{m}$ . (B) Fluorescence images along with electrode potential and fluorescence plots of 3  
 609 individual *S. oneidensis* cells from (A), highlighting the cell-to-cell variability in the larger  
 610 population. Scale bars are 2  $\mu\text{m}$ . (C) Images and plots of the  $\Delta Mtr/\Delta mtrB/\Delta mtrE$  mutant  
 611 during an identical two-step potential sequence. The mutant strain lacks genes encoding 8  
 612 functional periplasmic and outer membrane cytochromes. Scale bars are 20  $\mu\text{m}$ .

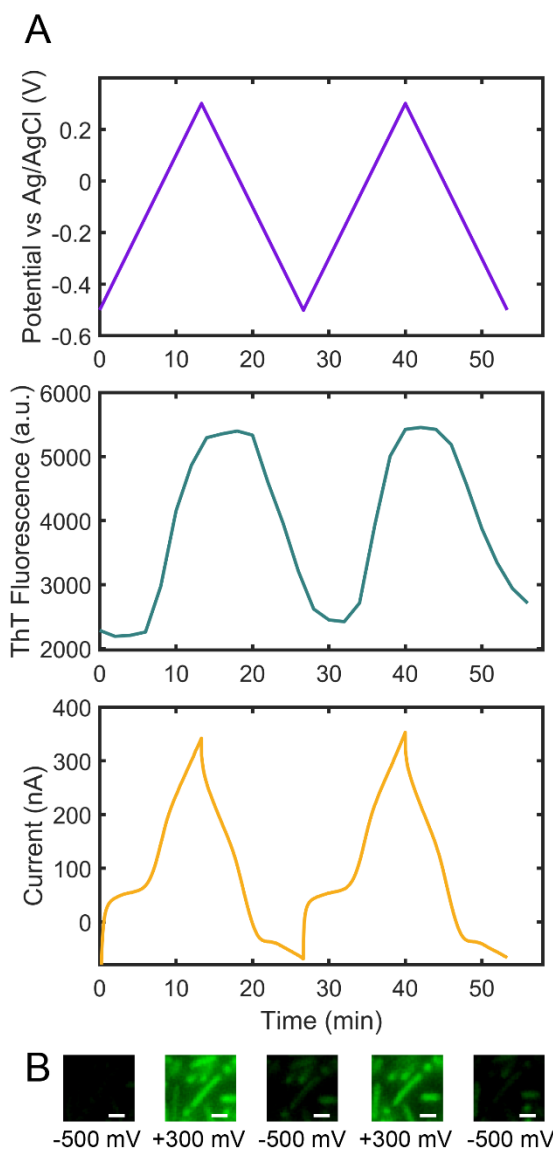

613

614

615 **Figure 3: *S. oneidensis* membrane potential is dependent on electrode potential during**  
616 **extracellular electron transfer (EET).** (A) Electrode potential (vs Ag/AgCl 1M KCl), average

617 cellular Thioflavin T (ThT) fluorescence, and current plots of *S. oneidensis* cells during cyclic

618 voltammetry (CV) in a bioelectrochemical reactor. (B) Fluorescence images of individual cells

619 during the CV scans in (A), revealing the single-cell level bioenergetic state during bulk CV.

620

620



621

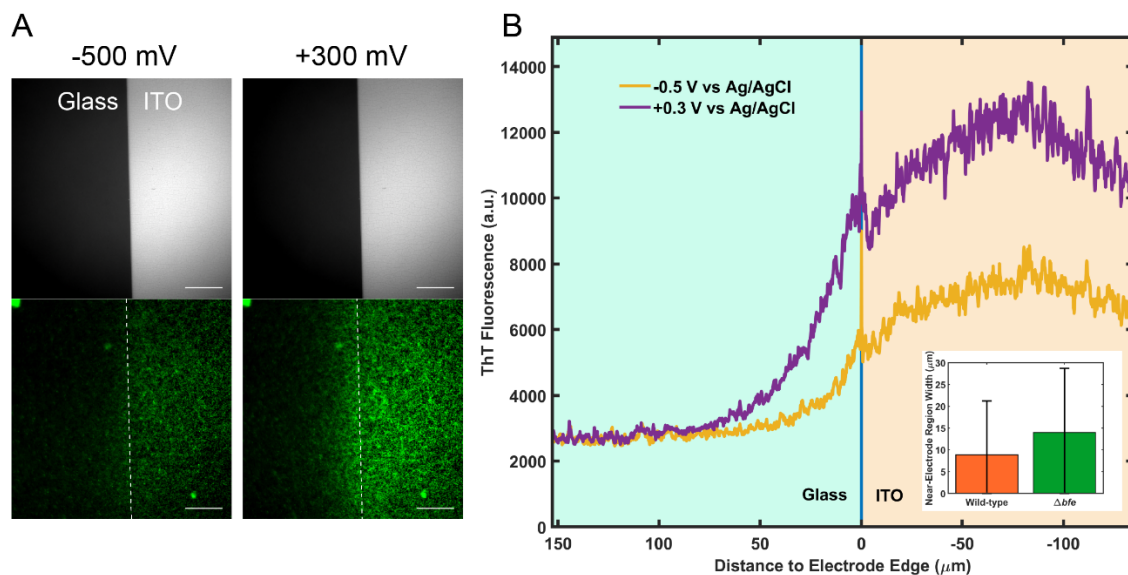

622

623

624

625

626

627

628

629

630

631

Figure 4: **Membrane potential in *S. oneidensis* cells during extracellular electron transfer is a function of microbe-anode distance.** (A) Brightfield (top) and Thioflavin T (ThT) fluorescence (bottom) images of *S. oneidensis* cells around the boundary between an ITO working electrode (WE) and glass, with the WE at -500 mV (left) and +300 mV (right) vs Ag/AgCl 1M KCl. Scale bars are 50 μm. (B) Average ThT fluorescence as a function of distance from ITO-glass edge in fluorescence images of (A). (Inset) Average width of the near-electrode region of hyperpolarization in *S. oneidensis* MR-1 (wild-type) and a flavin adenine dinucleotide exporter mutant ( $\Delta bfe$ ). Error bars represent standard deviation (n=3).

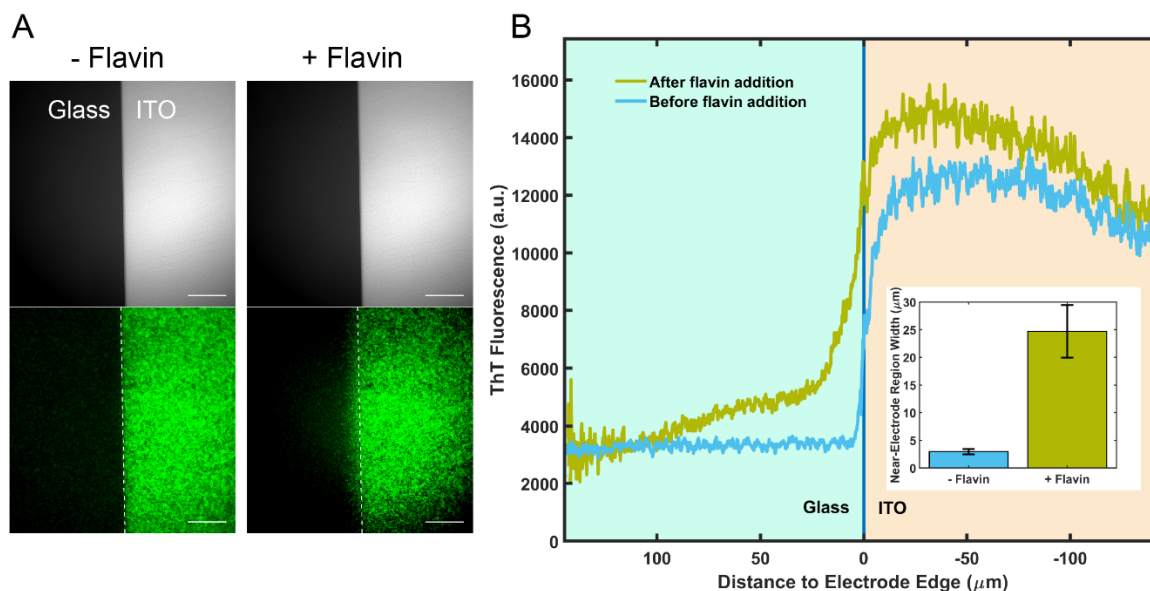

632

633

634

635

636

637

638

639

640

Figure 5: **Addition of exogenous riboflavin expands the near-electrode region of hyperpolarization in *S. oneidensis*.** (A) Brightfield (top) and Thioflavin T (ThT) fluorescence (bottom) images of *S. oneidensis* cells around the boundary between an ITO working electrode (at +300 mV vs Ag/AgCl 1M KCl) and glass, before (left) and after (right) the addition of 5 μM of riboflavin. Scale bars are 50 μm. (B) Average ThT fluorescence as a function of distance from ITO-glass edge in fluorescence images of (A). (Inset) Average width of the near-electrode region of hyperpolarization in *S. oneidensis* before and after the addition of 5 μM of riboflavin. Error bars represent standard deviation (n=3 separate fields of view).

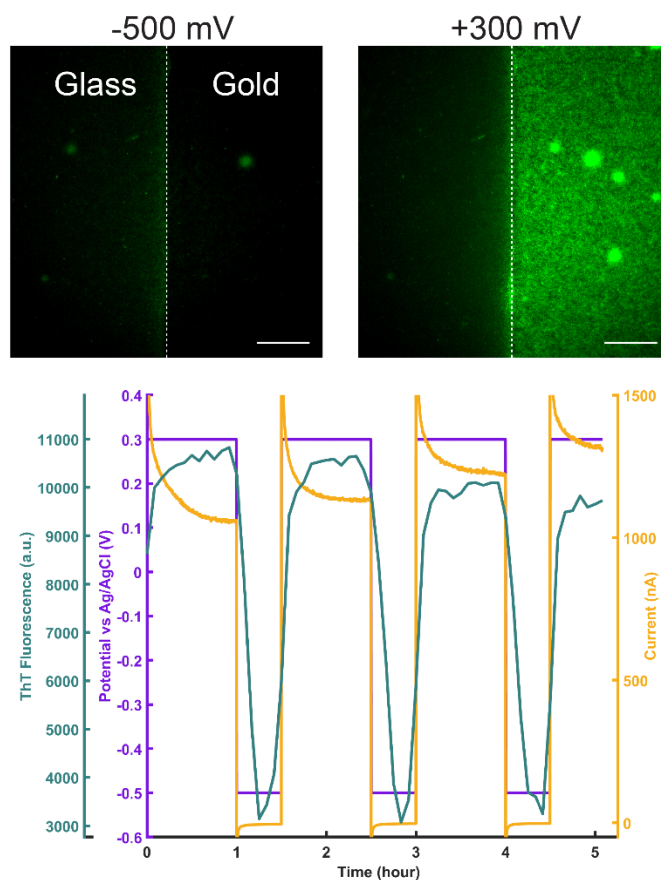

641  
642  
643  
644  
645  
646  
647  
648  
649

Figure 6: *S. oneidensis* can efficiently perform extracellular electron transfer on gold electrodes. Top: Thioflavin T (ThT) fluorescence images of *S. oneidensis* cells around the boundary between a gold working electrode (WE, right half of each image) and glass (left half of each image), with the WE at -500 mV (left image) and +300 mV (right image) vs Ag/AgCl 1M KCl. Scale bars are 50  $\mu\text{m}$ . Bottom: Electrode potential, current, and average ThT fluorescence plots of *S. oneidensis* cells on a gold working electrode during a two-step potential sequence (1 hr at +300 mV, 0.5 hr at -500 mV vs Ag/AgCl 1M KCl).

650  
651  
652

## Supplementary Materials

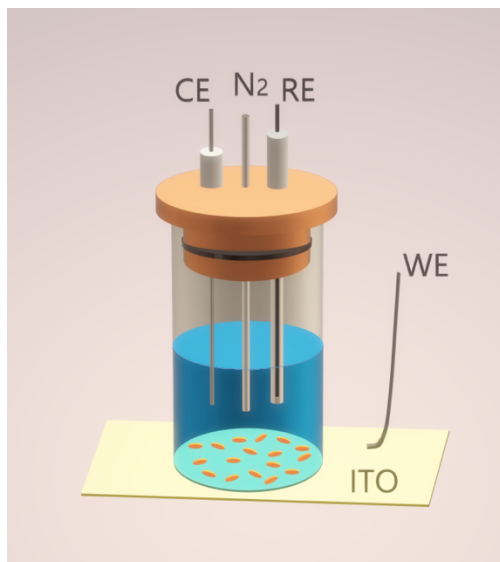

653  
654  
655  
656  
657  
658  
659

Fig. S1. **Schematic of the bioelectrochemical reactor.** The reactor consisted of a glass tube attached to a working electrode (WE, ITO or gold-coated glass coverslip) at the bottom and sealed with a cap holding the counter electrode (CE), the reference electrode (RE), and the N<sub>2</sub> port. Cells attached to the transparent WE were imaged from below by an inverted fluorescent microscope.

660  
661

### Captions for Supplementary Movies:

662  
663  
664  
665  
666  
667  
668  
669  
670

Movie S1: **Thioflavin T (ThT) fluorescence time-lapse movie of *S. oneidensis* wild-type and  $\Delta$ Mtr/ $\Delta$ mtrB/  $\Delta$ mtrE mutant cells on an ITO working electrode of a bioelectrochemical reactor.** (Left) Fluorescence time-lapse movie along with the electrode potential, current, and average ThT fluorescence plots of *S. oneidensis* cells on the working electrode during a two-step potential sequence (1 hr at +300 mV, 0.5 hr at -500 mV vs Ag/AgCl 1M KCl). (Right) Movie and plots of the  $\Delta$ Mtr/ $\Delta$ mtrB/  $\Delta$ mtrE mutant ('cytochrome mutant') during an identical two-step potential sequence. The mutant strain lacks genes encoding 8 functional periplasmic and outer membrane cytochromes. Scale bars are 20  $\mu$ m.

671  
672  
673  
674  
675  
676  
677

Movie S2: **Thioflavin T (ThT) fluorescence time-lapse movie of individual *S. oneidensis* cells on an ITO working electrode of a bioelectrochemical reactor.** Fluorescence time-lapse movie along with electrode potential and fluorescence plots of 3 individual *S. oneidensis* cells on the working electrode during a two-step potential sequence (1 hr at +300 mV, 0.5 hr at -500 mV vs Ag/AgCl 1M KCl). Scale bar is 2  $\mu$ m.

678  
679  
680  
681  
682

Movie S3: **Thioflavin T (ThT) fluorescence time-lapse movie of *S. oneidensis* cells during cyclic voltammetry (CV) in a bioelectrochemical reactor.** Fluorescence time-lapse movie along with electrode potential (vs Ag/AgCl 1M KCl), current, and average ThT fluorescence plots of *S. oneidensis* cells during CV in a bioelectrochemical reactor. The CV scan rate was 1 mV/s. Scale bar is 20  $\mu$ m.

683  
684  
685

Movie S4: **Thioflavin T (ThT) fluorescence time-lapse movie of *S. oneidensis* cells on a patterned-ITO working electrode of a bioelectrochemical reactor.** The movie shows

686 cells around the boundary between the ITO working electrode (right half) and glass (left  
687 half) during a two-step potential sequence (1 hr at +300 mV, 0.5 hr at -500 mV vs  
688 Ag/AgCl 1M KCl). The plots show the average ThT fluorescence as a function of distance  
689 from the ITO-glass edge in the movie. The yellow line on the plots indicates the ITO-glass  
690 edge. The working electrode potential (vs Ag/AgCl 1M KCl) in each frame is shown at  
691 the top. Scale bar is 50  $\mu\text{m}$ .

692  
693 **Movie S5: Thioflavin T (ThT) fluorescence time-lapse movie of *S. oneidensis* cells on**  
694 **a patterned-gold working electrode of a bioelectrochemical reactor.** The movie shows  
695 cells around the boundary between the gold working electrode (right half) and glass (left  
696 half) during a two-step potential sequence (1 hr at +300 mV, 0.5 hr at -500 mV vs  
697 Ag/AgCl 1M KCl). The plots show the average ThT fluorescence as a function of distance  
698 from the gold-glass edge in the movie. The yellow line on the plots indicates the gold-  
699 glass edge. The working electrode potential (vs Ag/AgCl 1M KCl) in each frame is shown  
700 at the top. Scale bar is 50  $\mu\text{m}$ .
